# Supplementary material
Source: publisher figshare collection journal article supplement (https://acs.figshare.com/ndownloader/files/26112983)
Supplement: Supplementary file 1 [file 26112983]

# Supporting Information

## Tunable Interface of Ruthenium Porphyrins and Silver

Peter Knecht<sup>1</sup>, Paul T. P. Ryan<sup>2,3</sup>, David A. Duncan<sup>2</sup>, Li Jiang<sup>1</sup>, Joachim Reichert<sup>1</sup>,  
Peter S. Deimel<sup>1</sup>, Felix Haag<sup>1</sup>, Johannes T. K  chle<sup>1</sup>, Francesco Allegretti<sup>1</sup>,  
Tien-Lin Lee<sup>2</sup>, Martin Schwarz<sup>1</sup>, Manuela Garnica<sup>1,4</sup>, Willi Auw  rter<sup>1</sup>,  
Ari Paavo Seitsonen<sup>5,6</sup>, Johannes V. Barth<sup>1</sup>, and Anthoula C. Papageorgiou<sup>1</sup>

<sup>1</sup>*Physics Department E20, Technical University of Munich, 85748 Garching, Germany*

<sup>2</sup>*Diamond Light Source, Harwell Science and Innovation Campus, Didcot, OX11 0QX, UK*

<sup>3</sup>*Department of Materials, Imperial College London, SW7 2AZ, UK*

<sup>4</sup>*Instituto Madrile  o de Estudios Avanzados en Nanociencia, Cantoblanco 28049, Madrid, Spain*

<sup>5</sup>*D  partement de Chimie,   cole Normale Sup  rieure (ENS), 75005 Paris, France*

<sup>6</sup>*Universit   de recherche Paris-Sciences-et-Lettres, Sorbonne Universit  , Centre National de la Recherche Scientifique, 75005 Paris, France*

## Contents

|            |                                                                  |     |
|------------|------------------------------------------------------------------|-----|
| Figure S1: | LEED of the Square Phase . . . . .                               | S-2 |
| Figure S2: | LEED of the Compressed Phase . . . . .                           | S-2 |
| Figure S3: | Model of the Registry of Square Phase to the Substrate . . . . . | S-3 |
| Figure S4: | STM of Square Phase Ru-TPP . . . . .                             | S-3 |
|            | Coherent Fraction and Position from DFT Results . . . . .        | S-3 |
| Figure S5: | STM of Planarized Ru-TPP . . . . .                               | S-5 |
| Figure S6: | Nc-AFM Simulation of a Planar Ru-TPP Derivate . . . . .          | S-5 |
| Figure S7: | NIXSW for Planar Ru-TPP Derivates . . . . .                      | S-6 |
| Table S1:  | NIXSW Results of the Planar Ru-TPP Derivates at 300 K . . . . .  | S-6 |

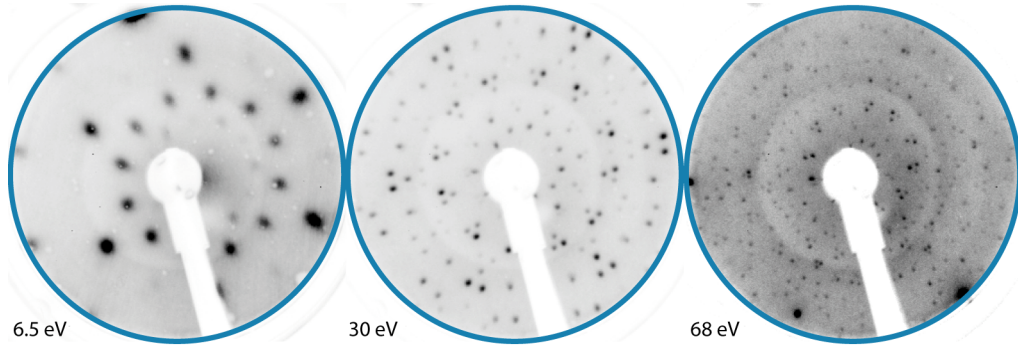

Figure S1: LEED pattern of square phase of Ru-TPP on Ag(111) at different electron energies.

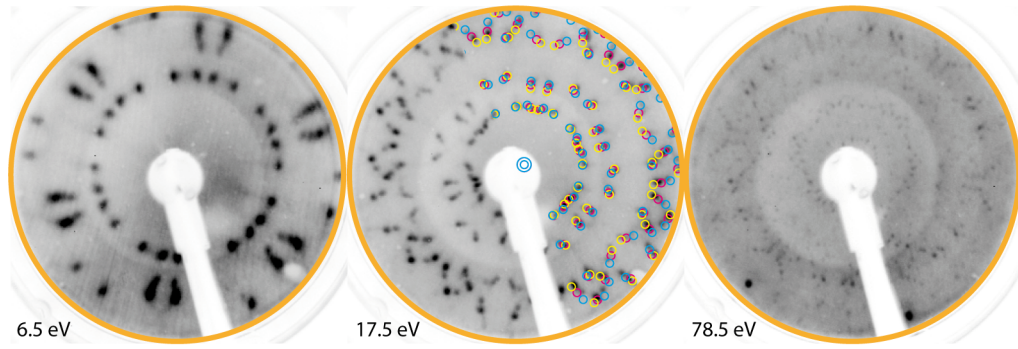

Figure S2: LEED pattern of the compressed phase of Ru-TPP on Ag(111) at different electron energies. At 17.5 eV there are different superstructures overlaid in different colors. Pink:  $\begin{pmatrix} 4.00 & 5.00 \\ 3.00 & -2.17 \end{pmatrix}$ , yellow:  $\begin{pmatrix} 5.17 & 4.04 \\ -2.37 & 2.88 \end{pmatrix}$ , blue:  $\begin{pmatrix} 3.89 & -0.93 \\ 3.21 & 5.16 \end{pmatrix}$ .

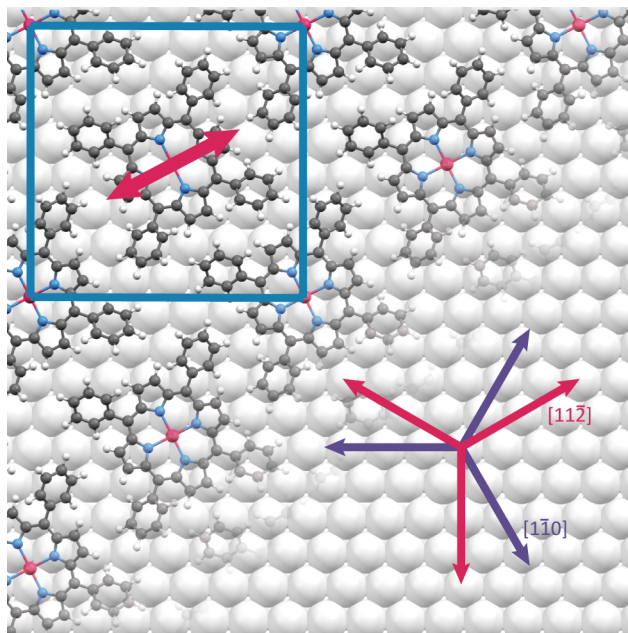

Figure S3: Model of square phase Ru-TPP on Ag(111), elucidating the registry to the substrate. The family of the high symmetry  $\langle 1\bar{1}0 \rangle$  directions is marked in violet, the family of the  $\langle 11\bar{2} \rangle$  directions in pink. The unit cell of the Ru-TPP is marked in blue, the  $\alpha$ -pyr axis of the Ru-TPP is marked in pink according to the substrate alignment.

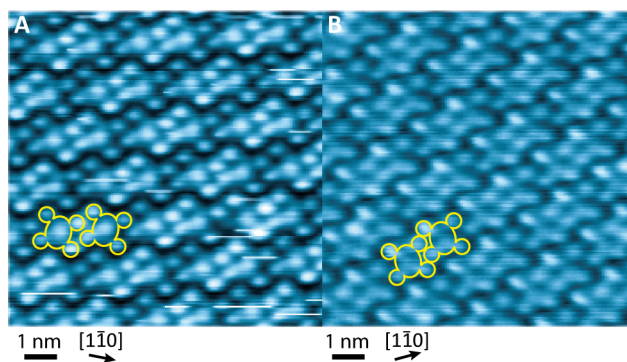

Figure S4: STM image of the square phase of Ru-TPP (A: 1.25 V, 20 pA, 300 K, B: 2.5 V, 90 pA, 300 K). The two outlined molecules show one example for a dimer, which can be easily recognized under these imaging conditions.

## Estimation of Coherent Fraction and Position from DFT Geometry

For the comparison of NIXSW data with the DFT simulations, we have simulated the coherent fraction  $f_H$  and coherent position  $P_H$  based on the geometry of the DFT as following:<sup>1</sup>

$$f_H = \sqrt{(G_H^c)^2 + (G_H^s)^2} \quad (1)$$

$$P_H = \frac{1}{2\pi} \arctan \left( \frac{G_H^s}{G_H^c} \right) \begin{cases} +\frac{1}{2} & \text{if } G_H^c < 0 \\ +0 & \text{otherwise} \end{cases} \quad (2)$$

$$G_H^c = \frac{1}{N} \sum_{i=1}^N \cos \left( 2\pi \frac{d_i}{a} \right) \quad (3)$$

$$G_H^s = \frac{1}{N} \sum_{i=1}^N \sin \left( 2\pi \frac{d_i}{a} \right) \quad (4)$$

Here  $N$  denotes the number of atoms that are contributing to the signal,  $d_i$  is the adsorption height of the  $i$ -th atom and  $a$  the lattice spacing of the crystal. It should be emphasized, that the calculated average adsorption height, determined by the coherent position  $P_H$  does not necessarily correspond to the actual average adsorption height of the measured atoms. If the adsorption height of two atoms differs by exactly half a lattice spacing, they will not contribute to  $P_H$ , which can be seen in the formulas above as a cancelling of their contributions due to the periodicity of the cos and sin functions. In the case of the Ru-TPP, an average adsorption height of the C atoms of 3.53 Å was calculated via DFT. However, calculating the coherent position that would be measured by a NIXSW experiment for this geometry resulted in  $P_H = 0.36$ , equivalent to an adsorption height of 3.20 Å. For the planarized Ru-TPP and the Ru centres the adsorption height extracted from the coherent position matches the average adsorption height of the corresponding species due to their more uniform adsorption heights, which does not allow the cancelling of single contributions.

---

<sup>1</sup>J. Zegenhagen, *Surf. Sci. Rep.*, 1993, **18**, S. 202.

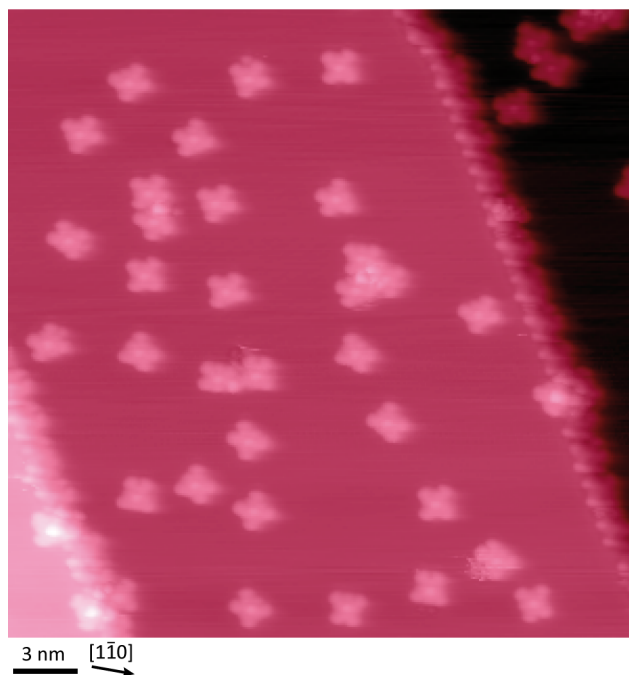

Figure S5: STM image (-0.5 V, 50 pA, 5 K) of a low coverage of planar Ru-TPP derivatives after annealing to 620 K.

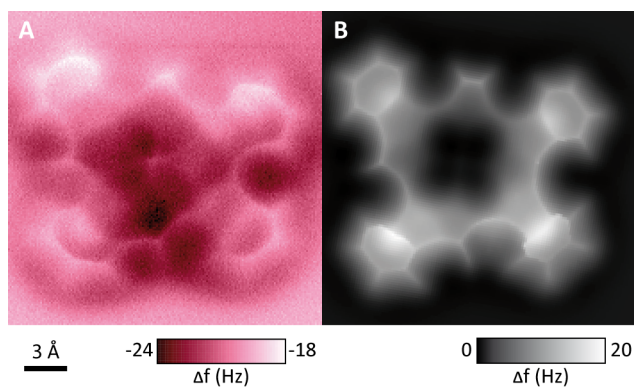

Figure S6: Comparison of nc-AFM frequency shift image (A) and respective simulation based on the DFT model (B) of a planarized Ru-TPP of the most abundant derivate (see Fig. 5B).<sup>2</sup>

<sup>2</sup>P. Hapala, G. Kichin, C. Wagner, F. S. Tautz, R. Temirov, P. Jelínek, *Phys. Rev. B*, 2014, **90**, S. 85421.; P. Hapala, R. Temirov, F. S. Tautz, P. Jelínek, *Phys. Rev. Lett.*, 2014, **113**, S. 226101.

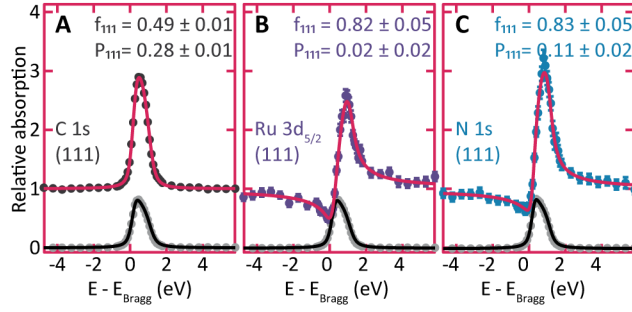

Figure S7: NIXSW fits in (111) reflection for planar Ru-TPP derivatives on Ag(111), measured at 300 K. Element and core level with the respective coherent fraction and position are given for each spectrum, the red line shows the fit for the indicated element, the black lines shows the reflection of the silver substrate.

Table S1: NIXSW results: Coherent fractions  $f_{hkl}$  and coherent positions  $P_{hkl}$  satisfying Bragg conditions from the (hkl) plane of the Ru, C and N signals of planar derivatives of Ru-TPP on Ag(111) recorded at 300 K.

|                                   | (hkl) | $f_{hkl}$       | $P_{hkl}$       | Adsorption height (Å) |
|-----------------------------------|-------|-----------------|-----------------|-----------------------|
| <i>Planarized Ru-TPP at 300 K</i> |       |                 |                 |                       |
| Ru 3d <sub>5/2</sub>              | (111) | $0.82 \pm 0.05$ | $0.02 \pm 0.02$ | $2.41 \pm 0.05$       |
| C 1s                              | (111) | $0.49 \pm 0.01$ | $0.28 \pm 0.01$ | $3.02 \pm 0.02$       |
| N 1s                              | (111) | $0.83 \pm 0.05$ | $0.11 \pm 0.02$ | $2.62 \pm 0.05$       |
